# Supplementary material for: Association of mir-196a-2 rs11614913 and mir-149 rs2292832 Polymorphisms With Risk of Cancer: An Updated Meta-Analysis
Source: Front Genet. 2019 Mar 15;10:186. doi: 10.3389/fgene.2019.00186 (PMC6429108; doi:10.3389/fgene.2019.00186)
Supplement: Supplementary file 1 [file Data_Sheet_1.ZIP]

Archive with 12 entries (11 files):
- Supplementary Figures/
- Supplementary Figures/Suppl. Fig. S1.pdf
- Supplementary Figures/Suppl. Fig. S10.tif
- Supplementary Figures/Suppl. Fig. S11.tif
- Supplementary Figures/Suppl. Fig. S2.pdf
- Supplementary Figures/Suppl. Fig. S3.pdf
- Supplementary Figures/Suppl. Fig. S4.pdf
- Supplementary Figures/Suppl. Fig. S5.pdf
- Supplementary Figures/Suppl. Fig. S6.pdf
- Supplementary Figures/Suppl. Fig. S7.tif
- Supplementary Figures/Suppl. Fig. S8.pdf
- Supplementary Figures/Suppl. fig. S9.pdf
